# Supplementary material for: Photopatternable Epoxy-Based Thermosets
Source: PubMed Central journal article supplement (PMC6695657; doi:10.3390/ma12152350), 2019-07-24
Supplement: materials-12-02350-s001.pdf [file materials-12-02350-s001.pdf]

# Photopatternable Epoxy-Based Thermosets

Michael Giebler <sup>1</sup>, Simone Radl <sup>1</sup>, Thomas Ules <sup>1</sup>, Thomas Griesser <sup>2</sup>, and Sandra Schlögl <sup>1,\*</sup>

<sup>1</sup> Polymer Competence Center Leoben GmbH, Roseggerstrasse 12, A-8700 Leoben, Austria;

[Michael.Giebler@pccl.at](mailto:Michael.Giebler@pccl.at) (M.G.); [Simone.Radl@pccl.at](mailto:Simone.Radl@pccl.at) (S.R.); [Thomas.Ules@pccl.at](mailto:Thomas.Ules@pccl.at) (T.U.)

<sup>2</sup> Institute of Chemistry of Polymeric Materials, Montanuniversitaet Leoben, Otto Glöckel-Strasse 2, A-8700 Leoben, Austria; [Thomas.Griesser@unileoben.ac.at](mailto:Thomas.Griesser@unileoben.ac.at)

\* Correspondence: [Sandra.Schloegl@pccl.at](mailto:Sandra.Schloegl@pccl.at); Tel.: +43-3842-402-2354

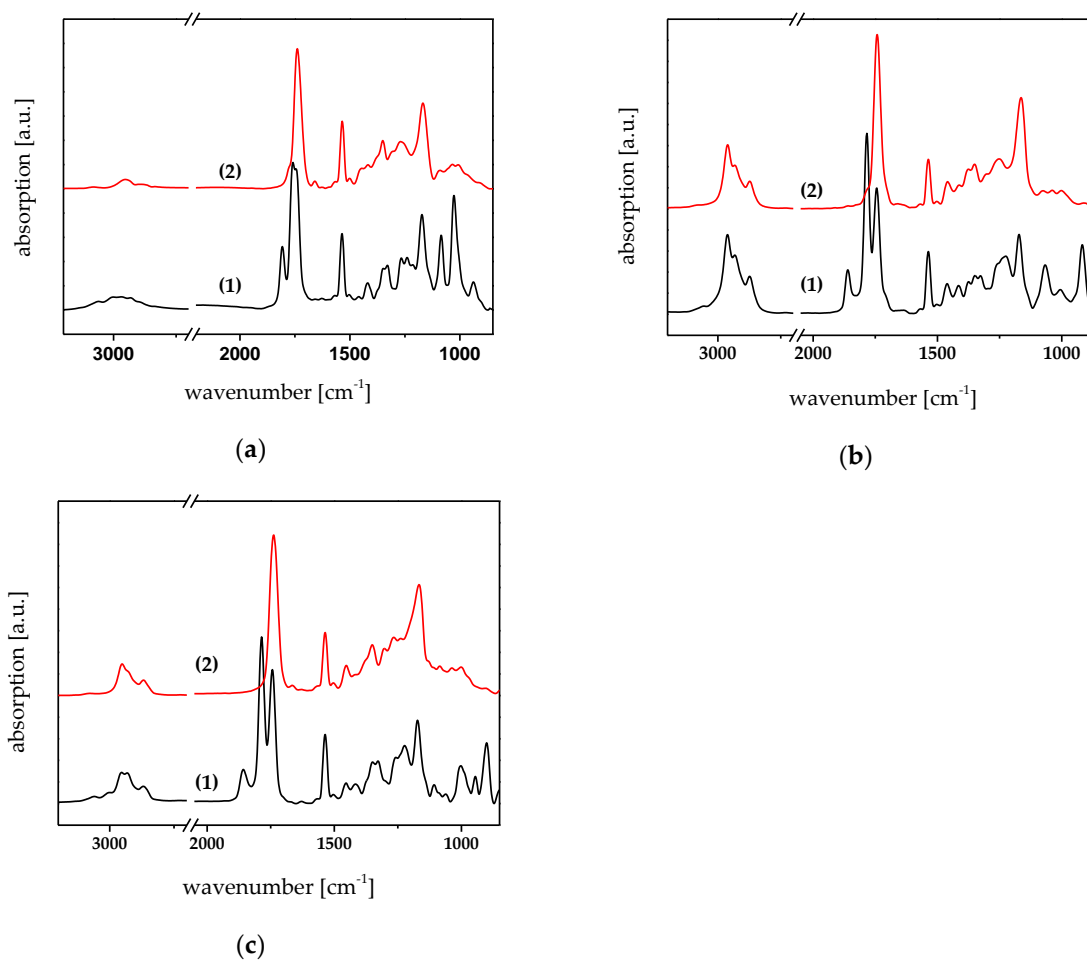

**Figure S1.** FT-IR spectra of (a) epoxy-NBE/GA, (b) epoxy-NBE/DDSA and (c) epoxy-NBE/HHMPA (1) prior to and (2) after thermal curing at 100 °C.

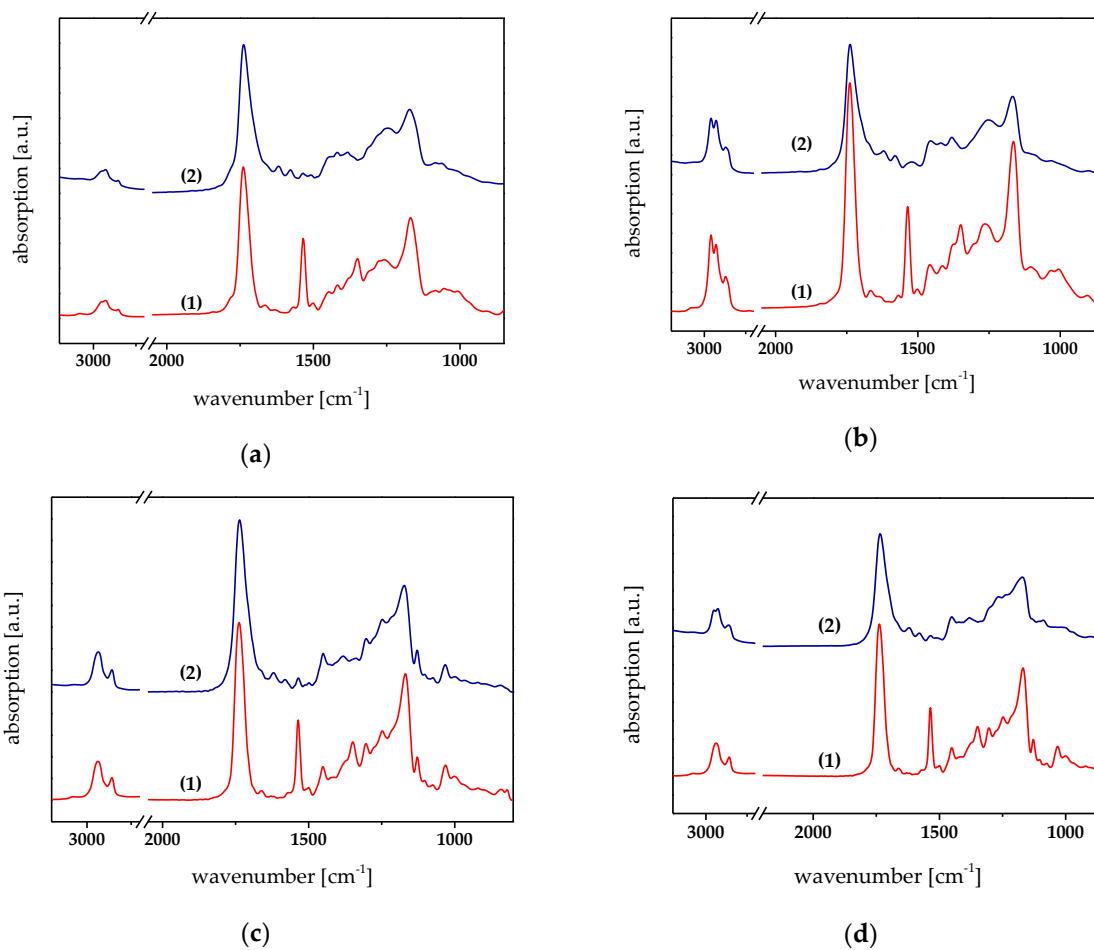

**Figure S2.** FT-IR spectra of (a) epoxy-NBE/GA, (b) epoxy-NBE/DDSA and (c) epoxy-NBE/HHMPA (1) prior to and (2) after photocleavage (74.5 mW cm<sup>-2</sup>).
